# Supplementary material for: The Stage of the Estrus Cycle Is Critical for Interpretation of Female Mouse Social Interaction Behavior
Source: PubMed Central journal article supplement (PMC7340104; doi:10.3389/fnbeh.2020.00113), 2020-06-30
Supplement: Table_1.pdf [file Table_1.pdf]

| Holeboard measure                        | Mean $\pm$ Standard error of mean (SEM)                                                 | One-way ANOVA statistics    |
|------------------------------------------|-----------------------------------------------------------------------------------------|-----------------------------|
| Basic movements (total # of beam breaks) | SR female: 3028 $\pm$ 185.1<br>NR female: 3037 $\pm$ 195.3<br>Male: 2827 $\pm$ 124.6    | (F(2,52)=0.4741, P>0.05) ns |
| Rearing (# of vertical beam breaks)      | SR female: 66.11 $\pm$ 7.75<br>NR female: 88.11 $\pm$ 13.37<br>Male: 65.60 $\pm$ 6.14   | (F(2,52)=1.887, P>0.05) ns  |
| Distance in periphery (cm)               | SR female: 4533 $\pm$ 213.6<br>NR female: 4443 $\pm$ 219.9<br>Male: 4369 $\pm$ 190      | (F(2,52)=0.1557, P>0.05) ns |
| Total time in periphery (sec)            | SR female: 842.9 $\pm$ 8.129<br>NR female: 831.9 $\pm$ 10.46<br>Male: 838.2 $\pm$ 7.93  | (F(2,52)=0.3882, P>0.05) ns |
| Number of entries into periphery         | SR female: 32.05 $\pm$ 4.62<br>NR female: 37 $\pm$ 5.75<br>Male: 30.06 $\pm$ 3.45       | (F(2,52)=0.5692, P>0.05) ns |
| Number of pokes into periphery           | SR female: 5.32 $\pm$ 1.13<br>NR female: 4.72 $\pm$ 0.72<br>Male: 6.83 $\pm$ 1.13       | (F(2,52)=1.121, P>0.05) ns  |
| Distance (cm) in center                  | SR female: 622.1 $\pm$ 85.91<br>NR female: 722.4 $\pm$ 102.5<br>Male: 615.4 $\pm$ 66.42 | (F(2,52)=0.4776, P>0.05) ns |
| Total time (sec) in center               | SR female: 57.06 $\pm$ 8.13<br>NR female: 68.07 $\pm$ 10.46<br>Male: 61.77 $\pm$ 7.93   | (F(2,52)=0.3882, P>0.05) ns |
| Number of entries into center            | SR female: 32.00 $\pm$ 4.61<br>NR female: 37.00 $\pm$ 5.78<br>Male: 30.06 $\pm$ 3.45    | (F(2,52)=0.5707, P>0.05) ns |
| Number of pokes into center              | SR female: 16.79 $\pm$ 1.95<br>NR female: 15.72 $\pm$ 1.82<br>Male: 24.28 $\pm$ 2.54    | F(2,52)=4.771, P<0.05) *    |
